# Supplementary material
Source: PubMed Central journal article supplement (PMC2727709)
Supplement: NIHMS90178-supplement-Table_Quantita.pdf [file NIHMS90178-supplement-Table_Quantita.pdf]

| Protein Name                      | Phosphorylation Site | Peptide Sequence                      | GI       | xcorr max | mass error | 0 sec SIC Peak Area | 10 sec SIC Peak Area | 30 sec SIC Peak Area | 1 min SIC Peak Area | 1.5 min SIC Peak Area | 2 min SIC Peak Area | 3 min SIC Peak Area | 5 min SIC Peak Area | 10 min SIC Peak Area |
|-----------------------------------|----------------------|---------------------------------------|----------|-----------|------------|---------------------|----------------------|----------------------|---------------------|-----------------------|---------------------|---------------------|---------------------|----------------------|
| Fc IgE receptor,gamma             | Y76                  | R.SQETY*ETLKHEKPPQ.-                  | 6753830  | 2.98      | 0.6        | 2.81E+04            | 6.28E+04             | 8.71E+04             | 1.63E+05            | 1.62E+05              | 1.50E+05            | 2.02E+05            | 2.44E+05            | 1.08E+05             |
| Fc IgE receptor,gamma             | Y76T78               | R.SQETY*ET*LKHEKPPQ.-                 | 6753830  | 2.987     | 0.5        | 6.32E+03            | 1.31E+04             | 2.43E+04             | 4.67E+04            | 4.09E+04              | 5.71E+04            | 5.85E+04            | 5.23E+04            | 3.39E+04             |
| FER tyrosine kinase               | Y402                 | K.VQENDGKEPPPVVNY*EEDAR.S             | 1673620  | 4.876     | 0.1        | 5.58E+04            | 4.69E+04             | 1.14E+05             | 2.24E+05            | 1.33E+05              | 1.14E+05            | 5.74E+04            | 1.63E+05            | 1.08E+05             |
| FPS/FES tyrosine kinase           | Y711                 | R.EEADGIY*AASAGLR.Q                   | 23452674 | 4.002     | 0.9        | 2.73E+04            | 3.62E+04             | 5.18E+04             | 8.72E+04            | 7.11E+04              | 9.64E+04            | 5.24E+04            | 1.13E+05            | 1.21E+05             |
| FXR1                              | Y68                  | K.EISEGDEVEVY*SR.A                    | 1122422  | 2.966     | 0.4        | 3.57E+04            | 3.01E+04             | 4.88E+04             | 4.48E+04            | 3.59E+04              | 2.07E+04            | 2.15E+04            | 2.62E+04            |                      |
| FYB/SLAP130                       | Y559*PS561           | K.TTAVEIDY*DS*LKR.K                   | 2232152  | 4.08      | 0.1        | 6.00E+04            | 7.02E+04             | 7.44E+04             | 1.89E+05            | 1.06E+05              | 1.41E+05            | 1.22E+05            | 3.72E+05            | 2.64E+05             |
| Fyn                               | Y417*                | R.LIEDNEY*TAR.Q                       | 309241   | 3.709     | 0.1        | 1.69E+05            | 1.30E+05             | 1.85E+05             | 2.04E+05            | 1.80E+05              | 1.96E+05            | 2.79E+05            | 3.39E+05            | 2.36E+05             |
| GAB2                              | S261Y263*            | R.HNTEFKDS*TY*DLPR.S                  | 4589377  | 4.554     | 0.1        | 5.63E+04            | 8.52E+04             | 2.11E+05             | 4.51E+05            | 3.73E+05              | 6.16E+05            | 1.04E+06            | 2.40E+06            | 9.44E+04             |
| GAB2                              | T262Y263*            | R.HNTEFKDST*Y*DLPR.S                  | 4589377  | 4.758     | 0.2        | 5.46E+04            | 1.15E+05             | 2.04E+05             | 4.31E+05            | 3.74E+05              | 6.16E+05            | 1.05E+06            | 2.12E+05            | 5.27E+04             |
| GAB2                              | Y263*                | R.HNTEFKDSTY*DLPR.S                   | 4589377  | 4.398     | 0.2        | 1.94E+04            | 6.03E+04             | 1.22E+05             | 2.61E+05            | 1.94E+05              | 2.45E+05            | 3.40E+05            | 5.73E+05            | 3.19E+05             |
| GAB2                              | Y290*                | K.SSLTGSSETDNEDVY*TFK.M               | 4589377  | 5.464     | 0.1        | 3.12E+04            | 1.38E+05             | 4.50E+05             | 1.50E+06            | 8.26E+05              | 1.17E+06            | 1.23E+06            | 1.24E+06            | 5.11E+05             |
| GAPDH                             | Y316*P               | K.LISWYDNEY*GYSNR.V                   | 6679937  | 5.38      | 0.1        | 2.43E+06            | 3.40E+06             | 3.08E+06             | 5.48E+06            | 2.79E+06              | 3.40E+06            | 4.28E+06            | 6.70E+06            | 5.23E+06             |
| GAPDH                             | Y318                 | K.LISWYDNEYGY*SNR.V                   | 6679937  | 4.486     | 3.4        | 2.43E+06            | 3.40E+06             | 3.08E+06             | 5.48E+06            | 2.79E+06              | 3.40E+06            | 4.28E+06            | 6.70E+06            | 5.23E+06             |
| Glycyl tRNA synthetase            | Y443                 | K.TSY*GWIEIVGCADR.S                   | 30725863 | 5.207     | 3.8        | 9.38E+04            | 9.62E+04             | 5.88E+04             | 1.04E+05            | 4.37E+04              | 2.59E+04            | 3.21E+04            | 8.45E+04            | 1.18E+05             |
| GSK3 beta                         | Y216*                | R.GEPNVSY*ICSR.Y                      | 7025915  | 3.186     | 6.0        | 8.17E+07            | 6.00E+07             | 6.44E+07             | 8.91E+07            | 6.77E+07              | 5.63E+07            | 7.52E+07            | 1.52E+08            | 8.66E+07             |
| GSK3 beta                         | Y216*S219            | R.GEPNVSY*ICS*R.Y                     | 7025915  | 3.535     | 5.2        | 1.49E+06            | 1.14E+06             | 9.89E+05             | 1.18E+06            | 9.59E+05              | 9.92E+05            | 8.53E+05            | 1.50E+06            | 1.15E+06             |
| H4 Histone A                      | Y52*P                | R.ISGLIY*EETR.G                       | 51309    | 3.787     | 1.2        | 3.48E+05            | 2.48E+05             | 2.98E+05             | 3.91E+05            | 2.57E+05              | 2.04E+05            | 2.98E+05            | 5.78E+05            | 4.89E+05             |
| HCV NS5A transactivated protein 7 | Y210*P               | R.YSYYDESQGEIY*R.S                    | 17046305 | 3.966     | 1.0        | 6.07E+04            | 5.24E+04             | 6.25E+04             | 7.81E+04            | 5.72E+04              | 4.87E+04            | 6.79E+04            | 1.32E+05            | 9.96E+04             |
| Heat shock 70kDa protein 4        | Y336*P               | K.LKKEDIY*AVEIVGGATR.I                | 31982275 | 3.601     | 0.6        | 9.35E+05            | 6.99E+05             | 5.30E+05             | 7.25E+05            | 3.80E+05              | 3.70E+05            | 4.35E+05            | 7.56E+05            | 6.88E+05             |
| Heat shock 70kDa protein 4        | Y661                 | K.LEDTENWLY*EDGEDQPK.Q                | 31982275 | 5.758     | 0.7        | 5.23E+04            | 2.33E+04             | 3.79E+04             | 6.28E+04            | 7.04E+04              | 1.90E+04            | 4.67E+04            | 1.19E+05            | 3.47E+04             |
| Heat shock 90 KD protein 1 alpha  | Y493                 | K.HIY*FITGETK.D                       | 6754254  | 3.129     | 1.7        | 3.86E+04            | 3.75E+04             | 3.41E+04             | 5.12E+04            | 3.31E+04              | 2.04E+04            | 2.82E+04            | 4.66E+04            | 4.65E+04             |
| Heat shock 90 KD protein 1 beta   | Y484                 | K.SIY*YITGESK.E                       | 6680305  | 4.103     | 1.2        | 5.97E+05            | 3.47E+05             | 3.64E+05             | 3.83E+05            | 3.04E+05              | 2.50E+05            | 2.50E+05            | 4.52E+05            | 3.42E+05             |
| hypothetical protein XP_150108    | Y278                 | R.ESYY*FGLSPEER.R                     | 28972590 | 2.78      | 2.0        | 6.39E+04            | 8.95E+04             | 2.86E+05             | 5.18E+04            | 8.02E+04              | 1.07E+05            | 1.54E+05            | 2.86E+05            | 1.89E+05             |
| Hypothetical protein, LOC134492   | Y145                 | K.ENPGDFDFSGAEISGNY*TK.G              | 13542906 | 3.574     | 0.1        |                     | 4.34E+03             | 1.87E+04             | 2.02E+04            | 2.46E+04              | 2.01E+04            | 3.17E+04            | 2.84E+04            | 2.49E+04             |
| IL3 receptor, beta                | S752Y765*            | R.VPS*GSPALGPPGFEDY*VELPPSVSQAAS.S    | 110595   | 4.737     | 0.8        | 4.17E+05            | 5.19E+05             | 7.78E+05             | 9.90E+05            | 6.06E+05              | 4.22E+05            | 5.88E+05            | 8.97E+05            | 6.31E+05             |
| IL3 receptor, beta                | Y765*                | R.VPSGSPALGPPGFEDY*VELPPSVSQAAS.S     | 110595   | 4.862     | 0.4        | 2.64E+05            | 4.23E+05             | 5.84E+05             | 7.81E+05            | 5.63E+05              | 4.34E+05            | 5.11E+05            | 7.87E+05            | 7.40E+05             |
| insulin receptor/IGF-1 receptor   | Y1179*               | R.DIYETDY*YRK.G                       | 6754360  | 2.541     | 1.4        | 1.04E+05            | 7.84E+04             | 6.95E+04             | 9.27E+04            | 8.00E+04              | 8.61E+04            | 1.14E+05            | 2.52E+05            | 1.60E+05             |
| integrin beta 1 subunit           | Y783*                | K.WDTGENPIY*K.S                       | 90972    | 3.185     | 0.9        | 6.14E+04            | 7.03E+04             | 9.39E+04             | 1.05E+05            | 8.08E+04              | 5.47E+04            | 7.37E+04            | 1.55E+05            | 7.65E+04             |
| Intersectin 2                     | Y553*P               | K.LIY*LVPEK.Q                         | 6755502  | 2.836     | 0.5        | 1.35E+04            | 1.03E+04             | 1.33E+04             | 2.17E+04            | 1.91E+04              | 2.06E+04            | 4.46E+04            | 1.70E+05            | 1.48E+05             |
| Intersectin 2                     | Y921*P               | R.GEPEALY*AAVTK.K                     | 6755502  | 3.853     | 0.7        | 5.75E+04            | 8.59E+04             | 2.06E+05             | 3.45E+05            | 4.14E+05              | 5.96E+05            | 9.91E+05            | 1.59E+06            | 9.69E+05             |
| Kinesin 2                         | Y444                 | K.DGSFAFGEY*GGWYK.A                   | 13878546 | 3.694     | 1.8        | 1.29E+04            | 1.78E+04             | 4.36E+04             | 6.72E+04            | 5.14E+04              | 3.74E+04            | 3.67E+04            | 5.37E+04            | 1.42E+04             |
| Lactate dehydrogenase A           | Y239*P               | K.QVVDASAY*EVIK.L                     | 1200099  | 3.11      | 1.1        | 8.36E+04            | 6.95E+04             | 8.30E+04             | 8.01E+04            | 7.21E+04              | 5.60E+04            | 6.82E+04            | 1.50E+05            | 9.61E+04             |
| Lyn                               | Y194                 | R.SLDNGGY*ISPR.I                      | 307144   | 3.228     | 0.1        | 3.12E+04            | 3.60E+04             | 4.72E+04             | 7.63E+04            | 5.14E+04              | 4.52E+04            | 5.09E+04            | 1.35E+05            | 9.08E+04             |
| Lysosomal-associated protein 5    | Y258                 | K.VALPSYEEALSPLPKTPEGDPAPPY*SEV.-     | 1255242  | 3.648     | 1.9        | 2.35E+05            | 5.25E+05             | 1.46E+06             | 3.36E+06            | 1.68E+06              | 1.37E+06            | 1.78E+06            | 1.82E+06            | 2.05E+06             |
| MAWD/STRAP                        | Y342                 | K.IGFPETAEEEEIEIASSENSDSIY*SSTPEVK.A  | 26344646 | 4.228     | 3.7        | 7.83E+04            | 5.43E+04             | 7.63E+04             | 1.29E+05            | 9.25E+04              | 2.74E+04            | 4.74E+04            | 4.89E+04            | 1.50E+04             |
| MIST/Clnk                         | Y69                  | K.CNSNNDY*EDPEFQLLK.A                 | 6492366  | 4.911     | 4.0        | 2.86E+04            | 6.29E+04             | 3.22E+05             | 8.71E+05            | 6.76E+05              | 1.18E+06            | 1.58E+06            | 2.07E+06            | 1.22E+06             |
| Monocyte Activated Protein, MAPA  | Y289                 | R.SVDQDSQPVY*CNLESLSGR.-              | 23346481 | 4.566     | 2.0        | 3.42E+04            | 1.02E+05             | 1.83E+05             | 1.83E+05            | 7.78E+04              | 8.22E+04            | 5.45E+04            | 4.87E+04            | 7.48E+04             |
| Myosin heavy chain 9              | Y754                 | K.ALELDSNLY*R.I                       | 20137006 | 3.027     | 0.5        | 7.82E+04            | 6.22E+04             | 7.86E+04             | 7.02E+04            | 5.99E+04              | 4.49E+04            | 6.02E+04            | 1.04E+05            | 6.16E+04             |
| Myotubularin related protein 6    | Y108                 | K.YEDLY*AFSYNPK.Q                     | 18043664 | 4.47      | 1.2        | 1.22E+05            | 6.07E+04             | 7.70E+04             | 1.12E+05            | 7.00E+04              | 5.90E+04            | 5.56E+04            | 6.14E+04            | 7.19E+04             |
| NCK2/Grb4 SH2/SH3 adaptor         | Y110*P               | R.DASPTPSTDAEYPANGSGADRIY*DLNIPAFVK.F | 20532395 | 3.959     | 1.1        |                     | 1.40E+04             | 6.93E+04             | 9.89E+04            | 7.57E+04              | 1.27E+05            | 2.82E+05            | 3.93E+05            | 5.33E+05             |
| p38                               | T180Y182*            | R.HTDDEMT*GY*VATR.-                   | 15126598 | 4.806     | 0.2        | 5.25E+04            | 4.80E+04             | 7.15E+04             | 4.62E+04            | 6.07E+04              | 6.84E+04            | 4.27E+04            | 1.00E+05            | 5.39E+04             |
| p38                               | Y182*                | R.HTDDEMTGY*VATR.-                    | 15126598 | 4.826     | 0.0        | 1.28E+05            | 1.16E+05             | 1.52E+05             | 1.95E+05            | 1.77E+05              | 2.70E+05            | 3.71E+05            | 4.59E+05            | 1.65E+05             |
| PCTAIRE protein kinase 1          | Y176                 | K.LGEGTY*ATVYK.G                      | 53611    | 2.912     | 0.2        | 7.53E+05            | 5.60E+05             | 5.06E+05             | 8.69E+05            | 8.43E+05              | 8.47E+05            | 1.24E+06            | 3.47E+06            | 2.16E+06             |
| Phosphofructokinase 1             | Y650*P               | R.NESCSVNYTTDFIY*QLYSEEGK.G           | 6634465  | 4.437     | 2.7        | 2.02E+04            | 2.82E+04             | 4.07E+04             | 4.07E+04            | 2.78E+04              | 1.59E+04            | 3.00E+04            | 3.51E+04            | 4.08E+04             |
| Phosphoglucosmutase 1             | Y353                 | K.IALY*ETPTGWK.F                      | 31980726 | 3.499     | 1.1        | 2.38E+05            | 1.52E+05             | 1.55E+05             | 1.58E+05            | 1.41E+05              | 1.36E+05            | 1.29E+05            | 3.25E+05            | 1.74E+05             |
| Phosphoglycerate mutase 1         | Y26*P                | R.FSGWY*DADLSPAGHEEAK.R               | 10179944 | 4.674     | 0.1        | 1.11E+05            | 7.67E+04             | 1.76E+05             | 1.08E+05            | 1.70E+05              | 1.19E+05            | 1.26E+05            | 2.10E+05            | 1.43E+05             |
| PI 3 kinase regulatory p85, alpha | Y467                 | K.SREYDRLY*EEYTR.T                    | 20897586 | 4.517     | 0.2        | 3.32E+05            | 1.93E+05             | 1.71E+05             | 2.25E+05            | 1.42E+05              | 1.61E+05            | 1.34E+05            | 2.97E+05            | 2.05E+05             |
| PI 3 kinase regulatory p85, beta  | Y458*P               | K.SREYDQLY*EEYTR.T                    | 2181945  | 4.097     | 0.9        | 9.35E+04            | 7.28E+04             | 8.93E+04             | 4.06E+04            | 2.92E+04              | 3.31E+04            | 5.58E+04            | 1.92E+05            |                      |
| PKC delta                         | Y311*                | R.KLDTTTSVGIY*QGFEK.K                 | 8778120  | 6.403     | 0.2        | 6.93E+04            | 3.13E+04             | 7.35E+05             | 1.32E+06            | 1.27E+06              | 1.76E+06            | 2.62E+06            | 4.64E+06            | 2.66E+06             |
| PLC, gamma 1                      | Y771*                | K.IGTAEPDY*GALYEGR.N                  | 40675439 | 3.858     | 1.6        |                     | 3.14E+04             | 7.85E+04             | 1.41E+05            | 1.14E+05              | 9.97E+04            | 1.09E+05            | 2.11E+05            | 1.15E+05             |
| PLC, gamma 1                      | Y775*                | K.IGTAEPDYGALY*EGR.N                  | 40675439 | 3.41      | 0.8        |                     | 3.14E+04             | 7.85E+04             | 1.41E+05            | 1.14E+05              | 1.01E+05            | 1.18E+05            | 2.11E+05            | 1.15E+05             |
| PLC, gamma 2                      | Y1217*               | R.RQEELNNQLFLY*DTHQNL.R.G             | 23271777 | 7.012     | 2.3        | 9.57E+03            | 4.19E+04             | 9.39E+04             | 2.10E+05            | 1.48E+05              | 2.25E+05            | 2.84E+05            | 6.46E+05            | 5.35E+05             |
| PLC, gamma 2                      | Y1245*P              | K.EFNVNENQLQLY*QEK.C                  | 23271777 | 4.277     | 0.2        |                     | 9.57E+03             | 3.23E+04             | 5.56E+04            | 4.11E+04              | 6.83E+04            | 9.10E+04            | 6.90E+04            | 1.42E+05             |
| PLC, gamma 2                      | Y753*                | R.DINSLY*DVS.R.M                      | 23271777 | 3.936     | 0.6        | 1.24E+04            | 1.58E+05             | 1.46E+05             | 4.10E+05            | 3.33E+05              | 3.61E+05            | 6.72E+05            | 1.45E+06            | 8.25E+05             |
| Plectin 1                         | Y26                  | R.TSSEDNLY*LAVLR.A                    | 41322941 | 2.732     | 0.9        |                     | 7.35E+03             | 1.17E+04             | 1.84E+04            | 2.12E+04              | 1.16E+04            | 1.20E+04            | 2.73E+04            | 2.14E+03             |
| Plectin 1                         | Y3649                | R.LTAEDLY*EAR.I                       | 41322941 | 3.151     | 1.8        | 3.39E+04            | 3.27E+04             | 3.88E+04             | 4.57E+04            | 3.58E+04              | 2.19E+04            | 2.80E+04            | 3.75E+04            |                      |
| Poly(A) binding protein           | Y116                 | K.ALY*DTFSAFGNILSCK.V                 | 53754    | 5.251     | 5.1        | 1.11E+05            | 1.13E+05             | 9.36E+04             | 1.45E+05            | 9.61E+04              | 5.39E+04            | 9.15E+04            | 1.96E+05            | 1.54E+05             |
| PRP4 kinase                       | Y849*P               | K.LCDFGSASHVADNDITPY*LVSR.F           | 20330556 | 6.054     | 1.2        | 5.26E+05            | 5.45E+05             | 6.23E+05             | 1.06E+06            | 6.06E+05              | 5.44E+05            | 4.79E+05            | 1.10E+06            | 5.30E+05             |
| PTP receptor type alpha           | Y825*                | K.VVQEYIDAFSDY*ANFK.-                 | 6679557  | 6.541     | 2.3        | 2.93E+05            | 1.50E+05             | 2.40E+05             | 5.79E+05            | 4.54E+05              | 5.35E+05            | 6.55E+05            | 1.29E+06            | 9.31E+05             |
| PTP receptor type epsilon         | Y695*                | K.VVQDFIDIFSDY*ANFK.-                 | 7110707  | 5.552     | 2.2        | 4.03E+04            | 1.05E+05             | 3.02E+               |                     |                       |                     |                     |                     |                      |

| Protein Name                         | Phosphorylation Site | Peptide Sequence                          | GI       | xcorr max | mass error | 0 sec SIC Peak Area | 10 sec SIC Peak Area | 30 sec SIC Peak Area | 1 min SIC Peak Area | 1.5 min SIC Peak Area | 2 min SIC Peak Area | 3 min SIC Peak Area | 5 min SIC Peak Area | 10 min SIC Peak Area |
|--------------------------------------|----------------------|-------------------------------------------|----------|-----------|------------|---------------------|----------------------|----------------------|---------------------|-----------------------|---------------------|---------------------|---------------------|----------------------|
| RasGAP3                              | Y66                  | K.SLCPFYGEDFY*CEIPR.S                     | 972944   | 3.089     | 15.2       | 1.23E+05            | 8.23E+04             | 6.52E+04             | 1.04E+05            | 7.68E+04              | 4.72E+04            | 7.01E+04            | 1.73E+05            | 9.44E+04             |
| Rho GAP p190A                        | Y943*                | R.NEEENIY*SVPHDSTQGK.I                    | 55977867 | 3.808     | 0.3        | 5.05E+05            | 5.28E+05             | 1.05E+06             | 1.23E+06            | 7.88E+05              | 1.30E+06            | 1.64E+06            | 1.26E+06            | 1.49E+06             |
| RhoGAP 12                            | S238*PY241*P         | R.ATTPPNQGRPDS*PVY*ANLQELK.I              | 26986539 | 3.325     | 2.1        | 4.90E+04            | 8.23E+04             | 1.15E+05             | 2.47E+05            | 1.76E+05              | 1.76E+05            | 3.23E+05            | 9.67E+05            | 6.09E+05             |
| RhoGAP1/CDC42GAP                     | Y65                  | K.WDDPYY*DIAR.H                           | 31981892 | 2.559     | 3.0        | 1.54E+05            | 8.61E+04             | 1.23E+05             | 2.08E+05            | 9.74E+04              | 1.39E+05            | 6.01E+04            | 6.49E+04            | 3.79E+04             |
| Ribosomal protein L10a               | Y11                  | R.DTLY*EAVR.E                             | 54035460 | 2.811     | 3.6        | 3.52E+04            | 2.32E+04             | 2.87E+04             | 5.16E+04            | 3.53E+04              | 1.21E+04            | 2.61E+04            | 2.83E+04            | 6.18E+04             |
| Ribosomal protein S10                | Y12*P                | R.IAIY*ELLFK.E                            | 56541262 | 3.251     | 0.7        | 8.22E+05            | 6.35E+05             | 7.38E+05             | 8.15E+05            | 5.64E+05              | 2.52E+05            | 6.55E+05            | 1.06E+06            | 1.18E+06             |
| Ribosomal protein S3a                | Y256*P               | R.ADGY*EPPVQESV.-                         | 1841932  | 2.803     | 0.3        |                     |                      | 2.32E+04             | 3.61E+04            | 2.11E+04              | 3.76E+04            | 6.39E+04            | 9.45E+04            | 8.72E+04             |
| Ribosomal protein, large, P0         | Y24*P                | K.IIQLDDY*PK.C                            | 71139    | 3.299     | 1.0        | 6.05E+04            | 5.01E+04             | 7.60E+04             | 8.89E+04            | 6.50E+04              | 3.81E+04            | 2.70E+04            | 8.88E+04            |                      |
| RIKEN cDNA 2610016F04                | Y81                  | K.VVDDEIY*YFR.K                           | 27229015 | 3.235     | 0.4        | 3.49E+04            | 4.30E+04             | 4.27E+04             | 5.75E+04            | 3.50E+04              | 3.81E+04            | 3.98E+04            | 7.12E+04            | 5.09E+04             |
| RIKEN cDNA 2810441C07                | Y152                 | R.GLVY*EDVHR.A                            | 27369543 | 2.769     | 0.1        | 2.08E+04            | 2.04E+04             | 2.80E+04             | 1.16E+05            | 9.05E+04              | 8.39E+04            | 1.15E+05            | 1.80E+05            | 1.67E+05             |
| RIKEN cDNA 9130009D18                | Y508*P               | K.EAVY*SGVQSLR.S                          | 12836199 | 2.788     | 2.4        | 3.12E+05            | 2.91E+05             | 2.38E+05             | 3.64E+05            | 2.55E+05              | 3.73E+05            | 3.93E+05            | 1.00E+06            | 6.17E+05             |
| RIKEN cDNA 9930117H01                | Y160                 | R.NADY*ECLPTLKEEKPNSPSPDNES.-             | 28893325 | 5.654     | 3.7        | 1.58E+05            | 3.03E+05             | 5.35E+05             | 7.07E+05            | 3.82E+05              | 4.20E+05            | 4.63E+05            | 4.11E+05            | 2.01E+05             |
| SAM domain protein SAMSN1            | Y152                 | R.DSFRLDDDDSPY*SGPFCGR.A                  | 10800126 | 4.497     | 5.3        | 7.87E+04            | 1.65E+05             | 3.69E+05             | 5.56E+05            | 3.99E+05              | 3.07E+05            | 2.40E+05            | 2.85E+05            | 1.73E+05             |
| Scinderin                            | Y599                 | R.GDY*QTSPLLETR.A                         | 7441455  | 3.171     | 1.8        | 8.37E+04            | 8.09E+04             | 1.13E+05             | 7.78E+04            | 8.54E+04              | 9.24E+04            | 1.57E+05            | 2.84E+05            | 1.52E+05             |
| SET                                  | Y145                 | R.IDFYFDENPY*FENK.V                       | 13591862 | 5.005     | 3.5        | 1.64E+06            | 1.28E+06             | 1.28E+06             | 1.82E+06            | 8.38E+05              | 8.53E+05            | 8.15E+05            | 1.55E+06            | 1.16E+06             |
| SHC                                  | Y423*                | R.ELFDDPSY*VNIQNLDK.A                     | 14211984 | 6.017     | 1.7        | 9.18E+04            | 2.11E+05             | 1.20E+06             | 3.54E+06            | 3.14E+06              | 1.73E+06            | 1.27E+06            | 2.43E+06            | 2.43E+06             |
| SHIP                                 | S934Y944             | K.STLS*PDQQLTAWSY*DQLPK.D                 | 1209068  | 5.978     | 1.9        | 2.81E+04            | 1.35E+05             | 4.53E+05             | 8.05E+05            | 7.76E+05              | 3.90E+05            | 2.45E+05            | 1.12E+06            | 4.84E+05             |
| SHIP                                 | Y867*P               | K.LY*DFVK.T                               | 1209068  | 2.727     | 0.5        | 1.04E+04            | 3.30E+04             | 6.91E+04             | 1.50E+05            | 1.52E+05              | 1.10E+05            | 1.36E+05            | 1.74E+05            | 9.45E+04             |
| SHIP                                 | Y944                 | K.STLSPDQQLTAWSY*DQLPK.D                  | 1209068  | 4.794     | 2.8        |                     | 1.69E+04             | 8.40E+04             | 1.75E+05            | 1.34E+05              | 1.04E+05            | 1.37E+05            | 9.67E+04            | 3.90E+04             |
| SHP1                                 | Y377                 | R.VYGLY*SVTNSR.E                          | 4097669  | 2.924     | 1.9        | 2.81E+04            | 1.82E+04             | 2.78E+04             | 3.88E+04            | 3.55E+04              | 2.12E+04            | 2.36E+04            | 4.76E+04            |                      |
| SHP2                                 | Y62*P                | K.IQNTGDY*YDLYGGEK.F                      | 1304169  | 4.339     | 0.0        | 1.68E+05            | 1.45E+05             | 2.23E+05             | 2.50E+05            | 1.94E+05              | 1.40E+05            | 1.87E+05            | 2.80E+05            | 2.63E+05             |
| SKAP55R                              | Y151                 | K.TVIFY*YGSDKDK.Q                         | 4091780  | 3.799     | 1.3        | 1.72E+05            | 1.37E+05             | 1.32E+05             | 1.36E+05            | 1.43E+05              | 1.24E+05            | 1.44E+05            | 2.87E+05            | 1.79E+05             |
| SKAP55R                              | Y260*P               | R.SQPIDDEIY*EELPEEEEDTASVK.M              | 4091780  | 5.516     | 0.1        | 7.17E+05            | 1.08E+06             | 1.89E+06             | 2.99E+06            | 1.96E+06              | 1.77E+06            | 2.25E+06            | 4.76E+06            | 2.62E+06             |
| SKAP55R                              | Y75*P                | K.SVYLQEFQDKGDAEDGDEY*DDPFAGPADTISLASER.Y | 4091780  | 7.383     | 4.8        | 2.49E+04            | 3.06E+04             | 3.89E+04             | 8.12E+04            | 5.82E+04              | 3.82E+04            | 4.70E+04            | 9.08E+04            | 5.22E+04             |
| SLP76                                | Y23                  | R.SEVLAWNSDNLADY*FR.K                     | 1083554  | 4.537     | 1.5        |                     | 1.68E+04             | 1.97E+04             | 1.80E+04            | 2.57E+04              | 1.99E+04            | 1.44E+04            | 6.46E+04            | 4.91E+04             |
| Small fragment nuclease              | Y152                 | R.WYPEDY*EFAPK.K                          | 13097411 | 2.391     | 2.8        | 1.50E+05            | 1.57E+05             | 1.80E+05             | 2.52E+05            | 1.47E+05              | 1.73E+05            | 2.12E+05            | 4.69E+05            | 2.90E+05             |
| STE20 like kinase MST1               | Y433                 | K.IPQDGDY*EFLK.S                          | 8489867  | 2.59      | 2.6        | 7.02E+04            | 3.16E+04             | 5.88E+04             | 1.06E+05            | 1.08E+05              | 8.28E+04            | 1.08E+05            | 2.18E+05            | 1.24E+05             |
| SYK                                  | Y342*Y346*           | R.EALPMDTEVY*ESPY*ADPEEIRPK.E             | 818861   | 3.298     | 1.0        | 3.93E+04            | 1.04E+05             | 1.63E+05             | 3.51E+05            | 3.42E+05              | 2.59E+05            | 3.76E+05            | 6.07E+05            | 3.50E+05             |
| SYK                                  | Y540                 | K.WYAPECINY*YK.F                          | 818861   | 2.533     | 14.5       | 5.30E+04            | 4.79E+04             | 4.52E+04             | 6.26E+04            | 5.05E+04              | 3.00E+04            | 5.15E+04            | 1.24E+05            | 1.37E+05             |
| T-cell activation protein, MAPRE2    | Y166*P               | K.FYDANYDGKEY*DPVEAR.Q                    | 19387961 | 4.169     | 2.9        | 5.02E+04            | 6.07E+04             | 1.12E+05             | 1.24E+05            | 1.21E+05              | 6.56E+04            | 7.34E+04            | 8.78E+04            | 5.61E+04             |
| TEC tyrosine kinase                  | Y415                 | R.YVLDDQY*TSSSGAK.F                       | 110868   | 4.111     | 0.6        |                     | 1.32E+04             | 3.24E+04             | 7.35E+04            | 5.61E+04              | 8.76E+04            | 1.30E+05            | 2.91E+05            | 1.93E+05             |
| TIAM1                                | Y1323*P              | R.LSIY*EEWDPFR.F                          | 6678351  | 3.725     | 2.4        | 1.19E+05            | 1.87E+05             | 3.58E+05             | 5.03E+05            | 4.10E+05              | 2.96E+05            | 4.35E+05            | 6.60E+05            | 6.01E+05             |
| Tight junction protein 1; ZO-1       | Y1353                | R.SNHYPDEEDEEY*YRK.Q                      | 303710   | 4.689     | 0.5        |                     | 2.69E+04             | 4.42E+04             | 7.74E+04            | 8.65E+04              | 1.02E+05            | 1.76E+05            | 3.14E+05            | 1.11E+05             |
| Transferrin receptor                 | Y20*P                | R.SAFSNLFGGEPLSY*TR.F                     | 54915    | 5.541     | 1.6        | 1.50E+05            | 2.53E+05             | 2.74E+05             | 3.09E+05            | 2.37E+05              | 2.48E+05            | 2.80E+05            | 5.27E+05            | 4.41E+05             |
| TRIP4                                | Y289*P               | R.TQVIDDES DY*FASDSNQWLSK.V               | 18204665 | 4.527     | 0.3        | 2.06E+04            | 3.79E+04             | 7.59E+04             | 9.16E+04            | 5.74E+04              | 3.61E+04            | 4.69E+04            | 7.84E+04            | 6.82E+04             |
| Tubulin, beta                        | Y340                 | K.NSSY*FVEWIPNNVK.T                       | 91857    | 3.665     | 4.8        | 4.39E+04            | 1.61E+04             | 2.47E+04             | 4.02E+04            | 2.31E+04              | 2.76E+04            | 5.03E+04            | 1.27E+05            | 8.73E+04             |
| TXK tyrosine kinase                  | Y420*                | R.YVLDDDEY*ISSSGAK.F                      | 7305601  | 3.572     | 0.0        | 3.24E+04            | 3.61E+04             | 4.01E+04             | 5.73E+04            | 3.71E+04              | 3.46E+04            | 3.98E+04            | 9.45E+04            | 5.92E+04             |
| TYK2 tyrosine kinase                 | Y600                 | R.TNVY*EGLLR.V                            | 5733095  | 2.645     | 1.4        | 1.83E+04            | 1.71E+04             | 1.84E+04             | 2.37E+04            | 1.88E+04              | 1.51E+04            | 9.85E+03            | 1.98E+04            |                      |
| UBCH6                                | Y77                  | K.GDNIY*EWR.S                             | 6678479  | 2.97      | 0.6        | 4.23E+04            | 4.82E+04             | 4.54E+04             | 8.26E+04            | 6.74E+04              | 4.69E+04            | 5.40E+04            | 1.06E+05            | 6.56E+04             |
| Ubiquitin activating enzyme E1       | Y55*P                | K.NGSEADIDESLY*SR.Q                       | 111228   | 4.471     | 1.6        | 1.63E+04            | 3.34E+04             | 8.17E+04             | 1.57E+05            | 8.29E+04              | 6.76E+04            | 6.01E+04            | 1.36E+05            | 1.01E+05             |
| ubiquitin specific protease 24       | Y484                 | R.YVITIEDFY*SVPR.T                        | 51709370 | 4.015     | 3.5        | 7.07E+04            | 4.48E+04             | 4.77E+04             | 5.95E+04            | 4.22E+04              | 3.29E+04            | 5.51E+04            | 1.09E+05            | 1.17E+05             |
| Ubiquitin-specific protease 9. FAF-X | Y1815                | K.FNDY*FEFPR.E                            | 1527199  | 2.793     | 4.1        | 3.56E+04            | 3.51E+04             | 4.44E+04             | 5.08E+04            | 4.09E+04              | 2.68E+04            | 2.94E+04            | 4.26E+04            | 5.85E+04             |
| VAV                                  | Y844*P               | R.IGWFPSNYVEEDYSEY*C.-                    | 6755955  | 5.476     | 2.7        | 2.76E+06            | 5.11E+05             | 7.41E+05             | 2.20E+06            | 1.41E+06              | 1.77E+06            | 3.61E+06            | 6.91E+06            | 5.52E+06             |
| Vimentin                             | Y53*P                | R.SLY*SSSPGGAYVTR.S                       | 55408    | 3.73      | 2.6        | 8.12E+03            | 1.31E+04             | 1.33E+04             | 3.09E+04            | 4.43E+04              | 6.75E+04            | 1.23E+05            | 3.65E+05            | 1.58E+05             |
| VPS35                                | Y791                 | R.ESPESEGPYI*EGLIL.-                      | 11875394 | 3.324     | 1.9        | 3.70E+04            | 4.79E+04             | 7.41E+04             | 9.85E+04            | 7.76E+04              | 2.66E+04            | 3.58E+04            | 6.30E+04            | 6.51E+04             |
| WASP                                 | Y293*                | K.LIY*DFIEDQGGLEAVR.Q                     | 4096355  | 6.724     | 0.7        |                     | 1.44E+05             | 3.87E+05             | 6.14E+05            | 3.51E+05              | 2.59E+05            | 3.45E+05            | 8.62E+05            | 3.76E+05             |

| B) BMMC data set                    |                      |                                          |          |           |            |                     |                     |                     |  |  |  |
|-------------------------------------|----------------------|------------------------------------------|----------|-----------|------------|---------------------|---------------------|---------------------|--|--|--|
| Protein Name                        | Phosphorylation Site | Peptide Sequence                         | GI       | xcorr max | mass error | 0 sec SIC Peak Area | 1 min SIC Peak Area | 5 min SIC Peak Area |  |  |  |
| Advillin                            | Y748                 | K.NATLY*LNPSDGEPK.Y                      | 6857753  | 4.609     | 0.6        | 4.67E+05            | 1.76E+06            | 5.03E+05            |  |  |  |
| Advillin                            | Y748Y758             | K.NATLY*LNPSDGEPKY*YPVEVLLK.G            | 6857753  | 3.169     | 1.0        |                     | 9.46E+05            | 1.06E+05            |  |  |  |
| Advillin                            | Y85                  | K.DSSQDEQSCAAIYTTQLDDY*LGGSPVQHR.E       | 6857753  | 4.966     | 0.5        | 2.81E+04            | 1.49E+05            | 1.04E+05            |  |  |  |
| AHNAK nucleoprotein isoform 1       | S116Y126             | R.SSEVVLS*GDDEDYQRIY*TTK.I               | 61743961 | 3.686     | 1.9        | 1.35E+05            | 2.09E+06            | 3.68E+05            |  |  |  |
| AHNAK nucleoprotein isoform 1       | Y122                 | R.SSEVVLSGDDEDY*QR.I                     | 61743961 | 5.941     | 0.0        | 8.56E+05            | 1.28E+07            | 4.98E+06            |  |  |  |
| AHNAK nucleoprotein isoform 1       | Y122Y126             | R.SSEVVLSGDDEDY*QRIY*TTK.I               | 61743961 | 4.327     | 1.2        |                     | 2.09E+06            | 5.05E+04            |  |  |  |
| AHNAK nucleoprotein isoform 1       | Y716                 | K.VKGEY*EVTPPKLEGELK.G                   | 61743961 | 3.04      | 0.5        |                     | 2.99E+05            | 1.06E+05            |  |  |  |
| AHNAK nucleoprotein isoform 1       | S116Y122             | R.SSEVVLS*GDDEDY*QRIYTTK.I               | 61743961 | 5.282     | 0.8        | 1.23E+05            | 2.10E+06            | 3.68E+05            |  |  |  |
| aldo-keto reductase AKR1C12         | Y323                 | R.YLPAEFLADHPEYPFSEEY*.-                 | 6407382  | 4.657     | 0.1        | 7.04E+04            | 1.47E+06            | 1.10E+05            |  |  |  |
| Aminopeptidase N                    | Y852                 | R.YLSYTLNPDY*IR.K                        | 1674501  | 2.953     | 1.2        | 1.44E+04            | 3.69E+04            | 1.51E+04            |  |  |  |
| AMP deaminase 2                     | Y64                  | R.SAPY*EFPEESPIEQLEER.R                  | 21311925 | 4.012     | 2.7        | 1.18E+04            | 2.64E+05            | 1.07E+05            |  |  |  |
| ARAP3                               | Y1404*               | K.SPQGSVVEEQDELEEPVYEEPVY*EEVGAFPELTK.D  | 18700709 | 5.345     | 0.2        | 2.35E+05            | 1.13E+06            |                     |  |  |  |
| ATP receptor P2X4 subunit           | Y378                 | K.YKYVEDY*EQGLSGETDQ.-                   | 4019304  | 4.854     | 0.4        | 6.57E+04            | 6.07E+05            | 3.63E+05            |  |  |  |
| BC003940 protein                    | Y56                  | R.FIY*EAWQGVVER.D                        | 12805435 | 3.768     | 4.1        | 9.00E+03            | 4.86E+04            | 2.01E+04            |  |  |  |
| BCR                                 | S26Y36*              | R.GRSS*ESSCGLDGDY*EDAELNPR.F             | 37994655 | 5.164     | 6.9        |                     | 4.32E+05            | 2.75E+05            |  |  |  |
| BCR                                 | Y36*                 | R.SSESSCGLDGDY*EDAELNPR.F                | 37994655 | 4.311     | 6.0        | 5.96E+04            | 3.73E+05            |                     |  |  |  |
| BCR downstream signaling 1/STAP1    | Y170                 | K.EKEPVQDY*ADVLNPLPECFYAVSR.K            | 9910568  | 5.311     | 5.6        |                     | 4.05E+05            | 9.38E+04            |  |  |  |
| BCSC1                               | Y622                 | R.FY*SSFSGGFK.G                          | 37596282 | 3.229     | 0.4        | 4.92E+04            | 3.34E+05            | 1.56E+05            |  |  |  |
| Bruton's tyrosine kinase            | Y551*                | R.YVLDDEY*TSSVGSK.F                      | 1666703  | 5.428     | 0.2        | 1.60E+05            | 3.19E+06            | 4.96E+05            |  |  |  |
| C1qR/CD93                           | Y636                 | R.AESQAPENQY*SPTPGTDC.-                  | 5714405  | 4.084     | 11.3       | 3.75E+04            | 1.44E+05            | 6.73E+04            |  |  |  |
| C9orf78                             | Y147*P               | K.NAEDCLY*ELPENIR.V                      | 13542853 | 3.093     | 5.4        | 1.29E+05            | 2.85E+05            | 1.63E+05            |  |  |  |
| Catenin, delta 1                    | Y904                 | K.SLDNNY*STLNER.G                        | 32451614 | 2.731     | 0.3        | 8.73E+03            | 3.00E+04            |                     |  |  |  |
| CBP/PAG                             | Y224*P               | K.ADFAEY*ASVDR.N                         | 12005671 | 3.782     | 0.2        | 1.09E+05            | 4.52E+05            | 1.65E+05            |  |  |  |
| CD244                               | Y396                 | R.ELENFVY*S.-                            | 9651827  | 2.217     | 0.1        |                     | 3.89E+05            | 1.08E+05            |  |  |  |
| CD31                                | Y702*                | R.ATETVY*SEIR.K                          | 6679273  | 3.138     | 0.2        | 2.29E+04            | 8.80E+04            | 2.32E+04            |  |  |  |
| CD34                                | Y326*P               | R.LGEDPY*YTENGGGQYSSGPGASPETQGK.A        | 13879274 | 5.778     | 0.5        | 4.20E+04            |                     | 8.62E+04            |  |  |  |
| CDC2                                | Y15*                 | K.IGEGTY*GVVYK.G                         | 50360    | 3.471     | 0.2        | 2.77E+05            | 1.26E+05            | 3.00E+05            |  |  |  |
| Chromosome 20 open reading frame 18 | Y318*P               | R.NSQEAEVACPFIDSTY*SCPGK.L               | 9790279  | 4.712     | 18.0       |                     | 1.02E+06            | 7.67E+05            |  |  |  |
| Cofilin 1                           | Y140*P               | K.HELQANCY*EEVKDR.C                      | 109675   | 4.706     | 15.2       |                     | 1.60E+05            | 5.66E+04            |  |  |  |
| Cofilin 1                           | Y68*P                | K.NIILEEGKEILVGDVGTVDVDPY*TTFVK.M        | 109675   | 7.046     | 2.1        | 2.00E+05            | 5.47E+05            | 2.17E+05            |  |  |  |
| Cofilin 1                           | Y89*P                | R.YALYDATY*ETK.E                         | 109675   | 3.674     | 1.0        | 5.27E+05            | 2.66E+06            |                     |  |  |  |
| Cytoskeleton associated protein 1   | Y98*P                | R.LGEY*EDVSKVEK.Y                        | 60390860 | 4.111     | 1.4        | 1.34E+04            | 8.52E+04            | 2.27E+04            |  |  |  |
| DAP12                               | Y92*                 | K.QHIAETESPY*QELQGQRPEVYSDLNTQR.Q        | 2906002  | 2.967     | 0.5        | 1.02E+05            | 2.35E+05            | 6.15E+04            |  |  |  |
| DAP12                               | Y92*Y103*            | K.QHIAETESPY*QELQGQRPEVY*SDLNTQR.Q       | 2906002  | 3.868     | 2.2        | 1.01E+05            | 6.00E+05            | 1.15E+05            |  |  |  |
| DAPP1                               | Y139*                | R.EVEEPCY*ESVR.V                         | 5733602  | 3.716     | 9.5        | 3.73E+06            | 4.81E+07            | 2.30E+07            |  |  |  |
| Diaphanous homolog 1                | Y1104                | K.ELGDY*FVFDPK.K                         | 6681183  | 2.907     | 2.0        | 1.97E+04            | 9.43E+04            | 4.90E+04            |  |  |  |
| DOK1; p62dok                        | Y361*                | K.TKLTDSKEDIPIY*DEPEGLAPAPPR.G           | 4007990  | 5.707     | 0.0        | 2.05E+05            | 1.89E+06            | 1.94E+05            |  |  |  |
| DOK1; p62dok                        | Y408*                | R.LKEEGYELPYNPATDDY*AVPPPR.S             | 4007990  | 4.01      | 0.7        | 2.95E+04            | 5.40E+05            | 5.89E+04            |  |  |  |
| DOK1; p62dok                        | Y450*P               | K.GFSSDTALY*SQVQK.S                      | 4007990  | 5.265     | 2.0        | 5.75E+04            | 2.41E+06            | 2.64E+05            |  |  |  |
| DOK3; p62dok-like                   | S314Y325*P           | R.KLPLTDPGPQSLPLLLS*PTQEGPASGLY*ASVCK.Q  | 7305003  | 5.061     | 3.2        |                     | 1.30E+06            | 2.20E+05            |  |  |  |
| Elongation factor 1 alpha 1         | Y141*P               | R.EHALLAY*TLGVK.Q                        | 50797    | 3.257     | 0.8        | 3.23E+04            | 1.57E+05            |                     |  |  |  |
| Enolase                             | Y25*P                | R.GNPTVEVDLY*TAK.G                       | 182116   | 4.369     | 0.6        | 4.04E+05            | 1.57E+06            | 4.44E+05            |  |  |  |
| Enolase                             | Y44*P                | R.AAVPSGASTGIY*EALELR.D                  | 50847    | 4.62      | 0.4        | 1.24E+05            | 4.12E+05            | 1.44E+05            |  |  |  |
| Erbin                               | Y1122*P              | R.RTEGDY*LSYR.E                          | 28972678 | 3.155     | 0.3        | 2.61E+04            | 2.18E+05            | 5.53E+04            |  |  |  |
| ERK1                                | T203*Y205*           | R.IADPEHDHTGFLT*EY*VATR.-                | 21489933 | 5.138     | 0.2        | 4.24E+04            | 1.01E+07            | 3.04E+06            |  |  |  |
| ERK2                                | T183*Y185*           | R.VADPDHDHTGFLT*EY*VATR.W                | 53002    | 5.622     | 0.5        |                     | 5.74E+06            | 1.14E+06            |  |  |  |
| Ezrin                               | Y270                 | K.APDFVY*APR.L                           | 50881    | 3.92      | 0.8        | 1.04E+05            | 2.96E+05            | 1.42E+05            |  |  |  |
| FBP17                               | S113Y116             | R.RQS*GLY*DGQTHQVTNCAQDR.E               | 1255033  | 3.442     | 7.2        |                     | 2.73E+04            | 1.99E+04            |  |  |  |
| Fc IgE receptor, beta               | Y216                 | R.LYEELNVY*SPIYSELEDKGETSSPVDS.-         | 110554   | 3.895     | 0.5        | 4.14E+05            | 2.86E+06            | 2.03E+06            |  |  |  |
| Fc IgE receptor, beta               | Y220                 | R.LYEELNVYSPIY*SELEDKGETSSPVDS.-         | 110554   | 4.732     | 0.0        | 4.14E+05            | 2.86E+06            | 2.03E+06            |  |  |  |
| Fc IgE receptor, beta               | Y210*                | K.KVPDDRLY*EELNVYSPIYSELEDKGETSSPVDS.-   | 110554   | 7.114     | 0.8        | 1.13E+05            | 7.70E+05            | 1.80E+05            |  |  |  |
| Fc IgE receptor, beta               | Y210*S217            | K.KVPDDRLY*EELNVYS*PIYSELEDKGETSSPVDS.-  | 110554   | 6.805     | 0.3        |                     | 1.05E+06            | 5.60E+05            |  |  |  |
| Fc IgE receptor, beta               | Y210*Y216Y220        | K.KVPDDRLY*EELNVY*SPIY*SELEDKGETSSPVDS.- | 110554   | 5.01      | 1.6        |                     | 4.00E+05            | 1.89E+05            |  |  |  |
| Fc IgE receptor, beta               | Y210*Y220            | K.KVPDDRLY*EELNVYSPIY*SELEDKGETSSPVDS.-  | 110554   | 7.13      | 3.9        | 7.55E+04            |                     | 5.61E+05            |  |  |  |
| Fc IgE receptor, gamma              | Y65                  | K.ADAVY*TGLNTR.S                         | 6753830  | 4.604     | 0.0        | 3.13E+05            | 4.72E+06            | 1.36E+06            |  |  |  |
| FER tyrosine kinase                 | Y402                 | K.VQENDGKEPPPVVNY*EEDAR.S                | 1673620  | 5.768     | 0.2        | 2.53E+05            | 2.01E+06            | 4.63E+05            |  |  |  |
| FOP                                 | Y317                 | K.IGSLGLGTGEDEDY*ADDFNASASHR.S           | 47777353 | 3.25      | 2.5        |                     | 2.12E+05            | 8.40E+04            |  |  |  |
| Fps/Fes tyrosine kinase             | Y711                 | R.EEADGIY*AAASAGLR.Q                     | 23452674 | 4.863     | 0.6        | 2.58E+03            | 4.31E+05            | 2.25E+05            |  |  |  |
| FYB/SLAP130                         | Y277                 | K.SSFFSAPQY*FED.-                        | 19547899 | 3.715     | 0.2        |                     | 3.52E+05            | 8.93E+04            |  |  |  |

| Protein Name                                | Phosphorylation Site | Peptide Sequence                           | GI       | xcorr max | mass error | 0 sec SIC Peak Area | 1 min SIC Peak Area | 5 min SIC Peak Area |
|---------------------------------------------|----------------------|--------------------------------------------|----------|-----------|------------|---------------------|---------------------|---------------------|
| FYB/SLAP130                                 | Y559*P               | K.TTAVEIDY*DSLKR.K                         | 2232152  | 4.063     | 0.5        | 1.14E+05            | 8.52E+04            | 8.96E+04            |
| FYB/SLAP130                                 | Y559*PS561           | K.TTAVEIDY*DS*LKR.K                        | 2232152  | 5.233     | 0.7        | 7.03E+05            | 1.23E+06            | 4.14E+05            |
| GAB2                                        | S261Y263*            | R.HNTEFKDS*TY*DLPR.S                       | 4589377  | 3.585     | 0.1        |                     | 6.06E+05            | 1.89E+05            |
| GAB2                                        | Y263*                | R.HNTEFKDSTY*DLPR.S                        | 4589377  | 4.042     | 0.7        |                     | 9.06E+05            | 1.95E+05            |
| GAB2                                        | Y290*                | K.SSLTGSETDNEDVY*TFK.M                     | 4589377  | 5.034     | 0.5        | 2.60E+04            | 1.89E+06            | 2.08E+05            |
| GAPDH                                       | Y316*P               | K.LISWYDNEY*GYSNR.V                        | 6679937  | 4.292     | 5.1        | 1.82E+05            | 1.68E+06            |                     |
| Glucose-6-phosphate dehydrogenase           | Y507*P               | R.VGFQYEGTY*K.W                            | 51114    | 2.708     | 1.7        | 5.08E+03            | 1.88E+05            | 1.31E+05            |
| Grb4                                        | Y110*P               | R.DASPTPSTDAEYPANGSGADRIY*DLNIPAFVK.F      | 20532395 | 4.61      | 2.1        | 1.03E+05            | 4.87E+05            | 4.25E+05            |
| GSK3 beta                                   | Y216*                | R.GEPNVSY*ICSR.Y                           | 7025915  | 3.169     | 16.0       | 2.20E+06            | 1.07E+07            | 1.56E+06            |
| Heat shock 70kDa protein 4                  | Y661                 | K.LEDTENWLY*EDGEDQPK.Q                     | 31982275 | 4.804     | 4.3        | 9.40E+03            | 1.03E+05            | 5.64E+04            |
| Hematopoietic cell specific LYN substrate 1 | Y140                 | K.SAVGFDY*KGEVEK.H                         | 13938627 | 3.824     | 1.0        |                     | 1.36E+05            | 4.63E+04            |
| Heterogeneous nuclear ribonucleoprotein U   | Y240                 | R.GYFEYIEENKY*SR.A                         | 3329496  | 3.794     | 3.1        | 1.52E+04            |                     | 5.40E+04            |
| Hrs                                         | Y308*P               | K.AEPTPLASSAPPAGSLY*SSPVNSSAPLAEDIDPELAR.Y | 1089781  | 4.463     | 2.7        | 3.29E+04            | 2.15E+05            |                     |
| Hypothetical protein H41                    | Y213*P               | R.KTPQGPPEIY*SDTQFPSLQSTAK.H               | 18147007 | 4.257     | 1.7        | 3.60E+04            |                     | 2.70E+05            |
| hypothetical protein MGC36956               | Y132                 | K.NTGVTPEPLY*R.S                           | 21595104 | 2.736     | 0.4        | 1.26E+04            | 4.25E+04            | 2.34E+04            |
| Ig heavy chain V region                     | S84Y93T96            | K.SQVFFKMNS*LQADDTAIY*YCT*K.E              | 110132   | 3.27      | 0.8        |                     | 3.98E+06            | 1.53E+06            |
| Ig heavy chain V region                     | Y62T64S65            | R.NKANGYTTTEY*NT*S*LK.G                    | 110220   | 2.918     | 8.6        | 9.25E+05            | 3.34E+06            | 8.49E+05            |
| IL 3 receptor, beta                         | S752Y765*            | R.VPS*GSPALGPPGFEDY*VELPPSVSQAAS.S         | 110595   | 4.463     | 2.0        | 1.51E+05            |                     | 1.67E+05            |
| IL 3 receptor, beta                         | S754Y765*            | R.VPSGS*PALGPPGFEDY*VELPPSVSQAAS.S         | 110595   | 3.459     | 0.1        | 1.51E+05            | 3.55E+05            | 1.67E+05            |
| IL 3 receptor, beta                         | Y765*                | R.VPSGSPALGPPGFEDY*VELPPSVSQAAS.S          | 110595   | 5.148     | 0.3        | 2.61E+05            | 1.78E+06            | 4.07E+05            |
| Interleukin 2 receptor, gamma               | Y325                 | K.GLTESLQPDY*SER.F                         | 15928484 | 2.908     | 0.9        | 6.14E+04            | 1.08E+05            | 4.47E+04            |
| Intersectin 2                               | Y921*P               | R.GEPEALY*AAVTK.K                          | 6755502  | 4.144     | 0.9        | 1.77E+05            | 1.24E+06            | 5.09E+05            |
| Jak2                                        | Y570*                | R.REVGDY*GQLHETEVLLK.V                     | 2499669  | 3.616     | 0.6        | 2.47E+04            | 1.07E+05            |                     |
| KIT                                         | Y567*                | K.VVEEINGNNY*VYIDPTQLPYDHK.W               | 28512901 | 4.291     | 2.0        | 1.90E+05            | 1.56E+06            |                     |
| KIT                                         | Y567*Y569*           | K.VVEEINGNNY*VY*IDPTQLPYDHK.W              | 28512901 | 4.79      | 1.4        | 7.55E+04            | 3.67E+05            | 1.76E+05            |
| KIT                                         | Y569*                | K.VVEEINGNNY*VY*IDPTQLPYDHK.W              | 28512901 | 5.283     | 0.2        | 1.90E+05            | 1.56E+06            | 5.58E+05            |
| KIT                                         | Y702*                | R.DSFIFSKQEEQAEALY*K.N                     | 28512901 | 4.562     | 0.5        | 1.24E+05            | 2.76E+05            | 8.03E+04            |
| KIT                                         | Y934*                | K.HIY*SNLANCNPENPVVVDHSVR.V                | 28512901 | 5.48      | 6.7        | 1.79E+05            | 4.12E+05            | 1.48E+05            |
| Leupaxin                                    | Y22*P                | R.CTFQDSEEY*SNPVSCHLDQQSTEESK.I            | 22035901 | 4.035     | 12.7       | 6.56E+04            |                     | 1.62E+05            |
| Leupaxin                                    | Y62                  | K.VQLVY*ATNIQEPNVYSEVQEPK.E                | 22035901 | 5.956     | 1.4        | 1.31E+04            | 1.77E+05            | 9.11E+03            |
| Leupaxin                                    | Y62Y72               | K.VQLVY*ATNIQEPNVY*SEVQEPK.E               | 22035901 | 4.73      | 2.0        | 2.84E+04            | 5.37E+05            | 1.16E+05            |
| Leupaxin                                    | Y72                  | K.VQLVYATNIQEPNVY*SEVQEPK.E                | 22035901 | 5.603     | 0.8        | 1.82E+05            | 1.51E+06            | 3.27E+05            |
| Lpp                                         | Y302*P               | R.YYEPYY*AAGPSYGGGR.S                      | 55154563 | 4.154     | 0.9        | 2.80E+04            | 8.43E+04            | 6.15E+04            |
| Lyn                                         | Y193*P               | R.SLDNGGY*YISPR.I                          | 307144   | 3.273     | 0.2        | 1.17E+05            | 3.84E+05            | 9.78E+04            |
| Lysosomal-associated protein 5              | Y258                 | K.VALPSYEEALSLPPKTPGDPAPPPY*SEV.-          | 1255242  | 3.04      | 1.8        | 3.50E+05            | 7.68E+05            |                     |
| mast cell protease 6                        | Y98                  | R.EQYLY*GDQLLSLNR.I                        | 6857814  | 3.384     | 4.2        | 3.41E+04            |                     | 2.51E+04            |
| MAWD/STRAP                                  | Y342                 | K.IGFPETAEELIEIASENSISY*SSTPEVKA.-         | 26344646 | 3.974     | 4.7        |                     | 1.87E+05            | 6.36E+04            |
| Metastasis suppressor 1                     | Y544                 | R.AGPVSDY*DYFSVSGDQEAQQEFDKSSSTIPR.N       | 37359942 | 3.571     | 1.0        | 1.20E+04            | 7.50E+04            |                     |
| MIST/Clnk                                   | Y69                  | K.CNSNDY*EDPEFQLLK.A                       | 6492366  | 4.997     | 6.6        | 4.55E+05            | 2.59E+06            | 8.23E+05            |
| mKIAA1522 protein                           | Y108                 | K.GGWDHGDTSIQSSQTGPDEDTISIY*SQK.S          | 25021466 | 5.546     | 1.2        | 2.69E+04            | 1.64E+05            |                     |
| Moesin                                      | Y116                 | K.EGILNDDIY*CPPETAVLLASYAVQSK.Y            | 28703650 | 4.183     | 4.7        | 1.02E+04            | 8.97E+04            | 3.86E+04            |
| NSFL1C cofactor p47                         | Y167                 | R.LGAAPPEESAY*VAGER.R                      | 41017503 | 3.283     | 0.1        | 5.72E+04            | 2.15E+05            |                     |
| NTAL                                        | Y59                  | R.NRQENASAAAQTY*SLAR.Q                     | 8470890  | 4.725     | 1.0        | 1.76E+04            | 6.29E+05            | 1.79E+05            |
| NTAL                                        | Y59S60               | R.NRQENASAAAQTY*S*LAR.Q                    | 8470890  | 4.731     | 0.7        |                     | 3.74E+05            | 7.34E+04            |
| p38                                         | Y182*                | R.HTDDEMTGY*VATR.-                         | 15126598 | 4.401     | 1.3        |                     | 2.48E+05            | 4.51E+04            |
| Phosphofructokinase 1                       | Y650*P               | R.NESCSVNYTTDFIY*QLYSEEGK.G                | 6634465  | 2.869     | 8.2        |                     | 3.15E+04            | 1.98E+04            |
| Phosphoglycerate mutase 1                   | Y26*P                | R.FSGWY*DADLSPAGHEEAK.R                    | 10179944 | 3.144     | 3.4        | 3.07E+04            | 5.99E+04            |                     |
| PKC delta                                   | Y311*                | R.KLDTTESVGIY*QGFEK.K                      | 8778120  | 6.633     | 0.2        | 3.99E+05            | 1.67E+07            | 4.38E+06            |
| PLC, gamma 1                                | Y771*                | K.IGTAEPDY*GALYEGR.N                       | 40675439 | 3.897     | 0.3        | 2.53E+04            | 5.96E+05            | 1.27E+05            |
| PLC, gamma 2                                | Y1217*               | R.RQEELNNQLFLY*DTHQNL.R.G                  | 23271777 | 7.077     | 0.3        | 3.35E+04            | 9.36E+05            | 1.47E+05            |
| PLC, gamma 2                                | Y1245*P              | K.EFNVNENQLQLY*QEK.C                       | 23271777 | 4.205     | 0.7        | 2.05E+04            | 6.35E+05            | 1.40E+05            |
| PLC, gamma 2                                | Y753*                | R.DINSLY*DVS.R.M                           | 23271777 | 3.613     | 0.6        | 8.02E+04            |                     | 6.21E+05            |
| Plectin 1                                   | Y3364                | R.ARQEEVY*SELQAR.E                         | 41322931 | 3.146     | 0.2        | 4.61E+03            | 3.63E+04            | 1.54E+04            |
| Plectin 1                                   | Y2783                | R.DAPDGPVSEAEPEY*TFEGLR.Q                  | 41322931 | 3.013     | 2.0        | 4.35E+04            |                     | 8.76E+04            |
| Plectin 1                                   | Y3035                | K.GGELVY*TDTEAR.D                          | 41322931 | 3.125     | 0.7        |                     | 4.20E+04            | 2.47E+04            |
| Plectin 1                                   | Y4617*P              | K.GYYSPY*SVSGSGSTAGSR.T                    | 41322931 | 4.277     | 0.7        |                     | 4.00E+04            | 5.38E+04            |
| protein tyrosine phosphatase 18             | Y381*P               | R.APTSTDTPY*SQVAPR.A                       | 2584837  | 4.558     | 0.2        | 7.56E+04            | 1.17E+05            | 3.61E+05            |
| protein tyrosine phosphatase 18             | Y419                 | R.RVPADQNSSGPDAY*EEVTDGAQTGGLGFNLR.I       | 2584837  | 5.621     | 0.0        |                     | 2.77E+05            | 9.48E+04            |
| PRP4 kinase                                 | Y849*P               | K.LCDFGSASHVADNDITPY*LVSR.F                | 20330556 | 5.02      | 7.0        | 4.86E+05            | 1.46E+06            | 4.04E+05            |
| PSTPIP2                                     | Y323                 | K.RIPDDPDY*SVVEDYSLLYQ.-                   | 3947712  | 4.638     | 1.8        | 3.51E+04            | 8.89E+05            | 2.30E+05            |

| Protein Name                             | Phosphorylation Site | Peptide Sequence                          | GI       | xcorr max | mass error | 0 sec SIC Peak Area | 1 min SIC Peak Area | 5 min SIC Peak Area |
|------------------------------------------|----------------------|-------------------------------------------|----------|-----------|------------|---------------------|---------------------|---------------------|
| PSTPIP2                                  | Y329                 | K.RIPDDPDYSVVEDY*SLLYQ.-                  | 3947712  | 4.611     | 0.7        |                     | 6.19E+05            | 2.12E+05            |
| PTP receptor type alpha                  | Y825*                | K.VVQEYIDAFSDY*ANFK.-                     | 6679557  | 6.073     | 0.1        | 3.71E+05            | 1.16E+06            | 2.49E+05            |
| PTP receptor type epsilon                | Y695*                | K.VVQDFIDIFSDY*ANFK.-                     | 7110707  | 4.308     | 3.2        | 5.95E+03            |                     | 1.66E+04            |
| PYK2                                     | Y402*                | R.SHLSSECSIESDIY*AEIPDETLR.R              | 988305   | 4.008     | 6.9        | 1.02E+05            |                     | 4.39E+04            |
| PYK2                                     | Y579*                | R.YIEDEDY*YKASVTR.L                       | 988305   | 3.232     | 2.3        | 6.65E+03            | 2.19E+05            | 5.27E+04            |
| PYK2                                     | Y579*Y580*           | R.YIEDEDY**Y*KASVTR.L                     | 988305   | 2.648     | 2.4        |                     | 5.21E+04            | 2.60E+04            |
| Rho GAP p190A                            | Y943*                | R.NEEENIY*SVPHDSTQGK.I                    | 55977867 | 4.544     | 0.7        | 3.11E+05            | 1.43E+06            | 9.14E+05            |
| Ribosomal protein S10                    | Y12*P                | R.IAIY*ELLFK.E                            | 56541262 | 2.757     | 2.2        | 1.17E+04            | 1.03E+05            | 3.75E+04            |
| Ribosomal protein S3a                    | Y256*P               | R.ADGY*EPPVQESV.-                         | 1841932  | 3.144     | 1.3        | 3.73E+04            | 4.20E+05            | 2.58E+05            |
| RIKEN cDNA 2310011J03                    | Y63*P                | R.AEDSEIQEQEY*QQSR.A                      | 21313500 | 3.677     | 0.6        | 1.30E+04            | 6.33E+04            | 2.24E+04            |
| RIKEN cDNA 2810407E01                    | Y81                  | R.IGIVGGCQEY*TGAPYFAGISALK.V              | 18043481 | 4.08      | 7.7        | 3.03E+04            |                     | 5.32E+04            |
| RIKEN cDNA 2810441C07                    | Y131*P               | R.FTFPALEEDVIY*DDVPCESPDHAHQPGAER.G       | 27369543 | 4.658     | 1.4        | 1.14E+05            | 4.79E+05            |                     |
| RIKEN cDNA 9130009D18                    | Y508*P               | K.EAVY*SGVQSLR.S                          | 12836199 | 2.371     | 0.7        | 9.05E+03            | 3.34E+04            |                     |
| RIKEN cDNA 9930117H01                    | Y160                 | R.NADY*ECLPTLKKEEKPNSPSPDNES.-            | 28893325 | 6.555     | 0.6        | 1.32E+06            | 6.32E+06            | 1.24E+06            |
| RIKEN cDNA 9930117H01                    | Y160S177             | R.NADY*ECLPTLKKEEKPNSPSPS*DNES.-          | 28893325 | 5.237     | 6.7        | 1.47E+05            | 8.47E+05            | 2.56E+05            |
| RIKEN cDNA F630103L12                    | Y13                  | R.TEGLDY*DTFPEVPATPGER.E                  | 27369954 | 4.219     | 1.7        | 1.26E+05            | 1.69E+05            | 2.22E+05            |
| Scinderin                                | Y102                 | R.ELQGY*ESTDFVGYFK.G                      | 7441455  | 4.036     | 1.3        | 1.42E+04            | 9.56E+04            |                     |
| Scinderin                                | Y599                 | R.GDY*QTSPLLETR.A                         | 7441455  | 3.886     | 0.0        | 5.09E+05            | 1.62E+06            | 5.06E+05            |
| Serpin                                   | Y166                 | R.LVLVNAIY*FK.G                           | 15029834 | 3.38      | 2.4        | 1.12E+04            |                     | 2.09E+04            |
| SET                                      | Y145                 | R.IDFYFDENPY*FENK.V                       | 13591862 | 4.237     | 1.2        | 1.28E+04            | 7.86E+05            | 1.47E+04            |
| SHC                                      | Y423*                | R.ELFDDPSY*VNIQNLDK.A                     | 21264509 | 5.864     | 0.5        | 1.90E+05            | 2.76E+06            | 1.66E+06            |
| SHIP                                     | S934Y944             | K.STLS*PDQQLTAWSY*DQLPK.D                 | 1209068  | 6.187     | 0.0        | 2.16E+05            | 2.78E+06            | 1.57E+06            |
| SHIP                                     | Y867*P               | K.LY*DFVK.T                               | 1209068  | 2.677     | 0.1        | 1.24E+05            | 6.81E+05            | 1.87E+05            |
| SHIP                                     | Y944                 | K.STLSPDQQLTAWSY*DQLPK.D                  | 1209068  | 4.626     | 1.8        | 5.67E+04            | 5.77E+05            |                     |
| SHIP1                                    | Y536*                | K.GQESEY*GNITYPPAVR.S                     | 4097669  | 4.103     | 1.1        | 4.31E+05            | 4.90E+06            |                     |
| SHIP2                                    | Y62*P                | K.IQNTGDY*YDLYGGEK.F                      | 1304169  | 4.371     | 0.3        |                     | 1.20E+06            | 2.73E+05            |
| Similar to hypothetical protein FLJ32731 | Y217                 | R.ADPLSADY*QPETR.R                        | 23272280 | 3.228     | 0.5        | 2.99E+04            | 8.66E+04            | 4.28E+04            |
| SKAP55R                                  | Y142                 | R.GLFLY*YANEK.S                           | 4091780  | 3.668     | 0.1        | 4.98E+05            | 1.68E+06            | 7.53E+05            |
| SKAP55R                                  | Y151                 | K.TVFY*YGSDDKDK.Q                         | 4091780  | 3.53      | 0.4        | 2.99E+04            | 1.35E+05            | 5.30E+04            |
| SKAP55R                                  | Y260*P               | R.SQPIDDEIY*EELPEEEEDTASVK.M              | 4091780  | 6.038     | 0.0        | 3.12E+06            | 9.69E+06            | 5.30E+06            |
| SKAP55R                                  | Y75*P                | K.SVYLQEFQDKGDAEDGDEY*DDPFAGPADTISLASER.Y | 4091780  | 6.9       | 3.4        | 5.94E+04            | 7.03E+05            | 2.39E+05            |
| SLP76                                    | Y23                  | R.SEVLAWNSDNLADY*FR.K                     | 1083554  | 4.244     | 0.3        | 9.14E+03            | 1.15E+05            | 3.08E+04            |
| STE20 like kinase MST1                   | Y433                 | K.IPQDGDY*EFLK.S                          | 8489867  | 3.022     | 1.3        | 6.94E+04            | 5.27E+05            | 1.69E+05            |
| SYK                                      | S310S313Y317*        | K.KPAPPQGSRPES*TVS*FNPY*EPTGGPWGPDR.G     | 818861   | 7.101     | 0.4        |                     | 9.30E+05            | 1.00E+06            |
| SYK                                      | S310Y317*            | K.KPAPPQGSRPES*TVSFNPY*EPTGGPWGPDR.G      | 818861   | 4.828     | 0.0        |                     | 8.63E+05            | 1.09E+05            |
| SYK                                      | Y317*                | K.KPAPPQGSRPES*TVSFNPY*EPTGGPWGPDR.G      | 818861   | 4.165     | 3.7        | 1.71E+05            | 9.98E+05            | 1.57E+05            |
| SYK                                      | Y519*Y520*           | R.ADENY*Y*KAQTHGKWPVK.W                   | 479013   | 3.387     | 1.1        |                     | 1.05E+06            | 1.90E+05            |
| SYK                                      | Y623                 | R.LRNY*YDVVN.-                            | 818861   | 2.567     | 0.1        |                     | 3.33E+07            | 1.56E+07            |
| SYK                                      | Y624                 | R.LRNY*YDVVN.-                            | 818861   | 2.978     | 0.2        |                     | 3.33E+07            | 1.56E+07            |
| Tec tyrosine kinase                      | Y415                 | R.YVLDDQY*TSSSGAK.F                       | 38566061 | 4.195     | 0.2        | 3.59E+04            | 3.16E+05            | 9.49E+04            |
| Thyroid hormone receptor interactor 4    | Y289*P               | R.TQVIDDES DY*FASDSNQWLSK.V               | 18204665 | 5.038     | 0.7        |                     | 1.08E+05            | 6.63E+04            |
| TIAM1                                    | Y1323*P              | R.LSIY*EEWDPPFR.F                         | 6678351  | 3.693     | 1.1        | 6.09E+05            | 2.97E+06            | 1.09E+06            |
| Tight junction protein 1; ZO-1           | Y1139                | R.FEEPAPLSY*DSR.T                         | 303710   | 3.056     | 0.6        |                     | 1.66E+05            | 1.19E+05            |
| TXK tyrosine kinase                      | Y420*                | R.YVLDDDEY*ISSSGAK.F                      | 7305601  | 4.859     | 1.4        | 7.40E+04            | 2.35E+05            | 7.11E+04            |
| TXK tyrosine kinase                      | Y91*                 | K.ALY*DFLPR.E                             | 2117815  | 3.06      | 1.0        | 1.53E+05            | 4.36E+05            | 2.53E+05            |
| Ubiquitin activating enzyme E1           | Y55*P                | K.NGSEADIDESLY*SR.Q                       | 111228   | 4.77      | 0.3        | 8.23E+04            | 1.92E+05            | 1.71E+05            |
| Ubiquitin-specific protease 9. FAF-X     | Y2540*P              | R.AQENY*EGGEEVSPQTK.D                     | 1527199  | 3.478     | 2.0        |                     | 7.10E+04            | 1.42E+04            |
| VAV                                      | Y844*P               | R.IGWFPNSYVEEDYSEY*C.-                    | 6755955  | 5.701     | 4.9        | 3.32E+05            | 3.06E+06            | 1.20E+06            |
| Vimentin                                 | Y53*P                | R.SLY*SSSPGGAYVTR.S                       | 55291    | 4.412     | 0.2        | 7.41E+04            | 1.71E+05            | 1.99E+05            |
| Vimentin                                 | Y53*PY61*P           | R.SLY*SSSPGGAY*VTR.S                      | 55291    | 2.902     | 0.6        |                     | 2.70E+05            | 4.95E+04            |
| VPS35                                    | Y791                 | R.ESPESEGPY*EGLIL.-                       | 7656643  | 4.024     | 0.9        | 6.38E+04            | 7.52E+05            | 2.05E+05            |
| WASP                                     | Y293*                | K.LIY*DFIEDQGGLEAVR.Q                     | 695151   | 6.333     | 0.5        | 2.80E+05            | 1.25E+06            | 4.97E+05            |
